# Rural Residence, Motorcycle Access, and Contraception Use in South and Southeast Asia

Jonathan A. Muir<sup>a</sup>, Scott R. Sanders<sup>b</sup>, Hannah Hendricks<sup>b</sup>, and Michael R. Cope<sup>b</sup>

<sup>a</sup>Department of Global Health, Emory University, Atlanta, Georgia

<sup>b</sup>Department of Sociology, Brigham Young University, Provo, Utah

## ABSTRACT

Access to contraception is critical for limiting fertility. Yet, in South and Southeast Asia, access to these resources is often limited by spatial inequalities between rural and urban areas. Access to a motorcycle may empower women living in rural areas to attenuate these spatial inequalities, increase their educational attainment and participation in labor markets, and thereby facilitate a shift in fertility preferences. Concomitantly, motorcycle access may increase access to contraception for geographically isolated women who desire to limit fertility. We employ logistic regression models to examine associations with contraception use and unmet need for contraception for women living in rural vs. urban areas and for women with vs. without access to a motorcycle. Roughly 40 percent of women reported current use of contraception while another 21 percent indicated an unmet need for contraception. After adjusting for other variables, women with a motorcycle were more likely to report current contraception use (AOR = 1.55, 95% CI [1.50, 1.61]), modern contraception use (AOR = 1.60, 95% CI [1.54, 1.66]), and traditional contraception use (AOR = 1.49, 95% CI [1.41, 1.58]) compared to women who did not own a motorcycle. Women with a motorcycle were less likely to report an unmet need for contraception (AOR = 0.65, 95% CI [0.62, 0.68]) after adjusting for other variables. Our results are consistent with the premise that motorcycles facilitate contraception use among women living in resource-limited countries in South and Southeast Asia and thereby contribute to decreases in fertility. These relationships are contextualized by whether a woman lives in an urban or rural setting, and the number of children already present in their household; they are robust to controlling for household-level wealth and other factors that may mediate associations with contraception use.

## KEYWORDS

Contraception, Fertility, Motorcycle, Rural-Urban Divide, Transportation

---

CONTACT Jonathan A. Muir Email: [jamuir@emory.edu](mailto:jamuir@emory.edu)

**NOTE: This preprint reports new research that has not been certified by peer review and should not be used to guide clinical practice.**

## **Acknowledgement**

Evaluating the economic, demographic, and social impacts of the mass influx of inexpensive motorcycles to limited-resource countries, especially in Southeast Asia, was the brainchild of the late Dr. Ralph B. Brown. Sadly, Dr. Brown is no longer with us. Former colleagues at Brigham Young University where he worked as Professor of Sociology have murmured against his continued listing as a co-author on manuscripts; even for manuscripts that he played a significant role in conceptualizing and contributing to their analysis and writing. To appease the murmuring voices, we have decided to no longer list Dr. Brown as last author on this and future manuscripts; however, we wish to express our deepest gratitude for his contributions, for the mentorship that he provided to many of us along our academic journeys, and for his unmitigated friendship. Ralph, you are dearly missed, hoser.

## **Conflict of Interest**

The authors have no conflict of interest associated with this article or research.

## **Data Availability**

The raw data used in this study are available upon written request from the Demographic Health Surveys (DHS) at <https://www.dhsprogram.com/data/available-datasets.cfm>.

## **Ethics Statement**

As a secondary analysis of de-identified data that are publicly available from the Demographic Health Surveys, this article was deemed non-human subjects and exempt from further ethics review.

# 1 INTRODUCTION

2 Synthesizing themes in demography, sociology, and geography we argue and present evidence that  
3 in the resource-limited countries of South and Southeast Asia, access to motorcycles facilitates  
4 transitions to lower fertility through increasing use of contraception. The first of three core themes  
5 in this research is the transition to low fertility and the prevalent use of contraception in resource-  
6 limited countries (Barber and Axinn 2004; Hirschman 1994; Korinek et al. 2006; Morgan and  
7 Hagewen 2006). The second theme, spatial inequality, addresses the classic question of social  
8 stratification “who gets what?” by adding the context of “where” (Lobao et al. 2007). Finally, the  
9 third theme considers the impact of physical mobility in attenuating spatial inequalities (Cooley  
10 1894; Leinbach 2000; Rigg 2002), specifically investigating the impact of motorcycles as a  
11 “distance demolishing technology” (Scott 2009: 11).

12  
13 Building from the widely held understanding that increases in educational attainment and labor  
14 market participation are associated with increased demand for limited fertility and that access to  
15 contraception is critical for limiting fertility (Axinn and Barber 2001; Bongaarts 1978; Bongaarts  
16 and Casterline 2018; Easterlin 1975; Hirschman 1994; Moursund and Kravdal 2003), we assert  
17 that access to education, labor markets, and contraception is often limited in resource-limited  
18 countries across spatial divides between rural and urban locations due to uneven development  
19 (Gottdiener and Hutchison 2010; Korinek et al. 2006; Smith 2008). We further assert that “distance  
20 demolishing technologies” (Scott 2009: 11); e.g., motorcycles in South and Southeast Asia, may  
21 help isolated individuals access resources that are generally located in more urban or suburban  
22 regions of resource-limited countries. Access to a motorcycle may help women living in rural areas  
23 attenuate disadvantages resulting from spatial inequalities and increase their educational

24 attainment and participation in labor markets (Jayachandran 2021; Lobao et al. 2007); thereby  
25 facilitating a shift in fertility preferences at the individual and family level. Concomitantly, access  
26 to a motorcycle may also increase access to and use of contraception for spatially isolated women  
27 who desire to limit fertility and thereby contribute to future declines in fertility (Bongaarts and  
28 Casterline 2018). We anticipate that examining these associations through the lens of a life course  
29 perspective for contraception use (Rindfuss et al. 1996) should enhance our overall understanding.

30

31 To test these assertions, we examine the extent to which residence in an urban versus a rural  
32 location is associated with the use of contraception for female respondents in Cambodia, Indonesia,  
33 Nepal, the Philippines, and Timor-Leste. We further analyze the extent to which motorcycle  
34 ownership is associated with contraception use and evaluate effect modification between  
35 motorcycle ownership, urban vs. rural residence, and the number of living children. These  
36 relationships are evaluated while adjusting for a suite of factors commonly associated with  
37 contraception use and/or fertility. Our results suggest that rural residence is negatively associated  
38 with contraception use, motorcycle ownership is positively associated with contraception use, and  
39 the association between motorcycle ownership and contraception use is stronger in rural areas  
40 compared to urban.

41

## 42 **BACKGROUND**

43 The demographic transition to low fertility and the prevalent use of birth control is one of the most  
44 thoroughly researched subjects in demography (Axinn and Yabiku 2001). Given the findings that  
45 fertility is a primary indicator of personal autonomy and social mobility (Dharmalingam and  
46 Morgan 1996; Docquier 2004; Ekert-Jaffe and Stier 2009; Korinek et al. 2006; Kravdal 1994), the

47 options and consequences of fertility are also central topics in social and economic development  
48 studies (Docquier 2004; Ekert-Jaffe and Stier 2009), with scholars endeavoring to create  
49 theoretical frameworks that explain changes in fertility in resource-limited countries (Korinek et  
50 al. 2006). However, the pursuit of fertility frameworks, particularly in resource-limited countries,  
51 is complex and debate continues. Extensive reviews of the fertility literature are already available  
52 (Hirschman 1994; Morgan and Hagewen 2006; Upadhyay et al. 2014); thus, only a brief review  
53 and synthesis is provided below.

54

55 The original theoretical framework used to explain fertility transitions came from Demographic  
56 Transition Theory (DTT), which posited that changes in fertility occur as a result of structural  
57 changes in society tied to modernization; e.g. urbanization, industrialization, increased education,  
58 and reduced infant and child mortality (Davis 1963; Notestein 1945; 1953). However, DTT's poor  
59 performance in anticipating fertility declines lead to substantial revisions and elaborations (Morgan  
60 and Hagewen 2006), not to mention critiques (Coale 1973). Subsequent research, in particular that  
61 of the European Fertility Project, offered an alternative explanation that focused on cultural  
62 settings, the diffusion of new ideas and norms, and social interactions as key components leading  
63 to changes in fertility (Bongaarts and Watkins 1996; Coale and Watkins 1986; Knodel and Walle  
64 1979). Similar arguments are posited in more recent research evaluating the impact of mass media  
65 in facilitating the rapid diffusion of new norms and values concerning fertility (Barber and Axinn  
66 2004). However, structural explanations of fertility change were revisited with economic-based  
67 arguments asserting that economic development results in a tradeoff between "quantity" and  
68 "quality" in raising children (Barro and Becker 1989; Becker 1960; Becker and Lewis 1973;  
69 Easterlin 1975). In essence, economic well-being shifts parents from seeking an increase in the

70 number of children for some immediate economic benefit to seeking to raise fewer but higher  
71 quality children for future economic benefit. Such arguments are echoed to a degree in Caldwell's  
72 work regarding wealth flows (Caldwell 1982). More recently, studies reinvestigating structural  
73 explanations for fertility changes have highlighted the importance of social changes that increase  
74 access to education and labor market participation and thereby increase the opportunity costs of  
75 fertility (Axinn and Barber 2001; Brewster and Rindfuss 2000; Ekert-Jaffe 1986; Ekert-Jaffe and  
76 Stier 2009; Hakim 2003; Knodel et al. 1984; Spain and Bianchi 1996). Addressing the wide variety  
77 of theoretical frameworks, Hirschman (1994) and Morgan and Hagewen (2006) concur that the  
78 various frameworks are not necessarily mutually exclusive and that reality likely resembles a  
79 synthesis of these frameworks rather than a competition (Hirschman 1994: 222).

80

81 Apart from the role of social and economic structures and cultural ideals and norms, more proximal  
82 causes (e.g., contraception use) are important factors influencing changes in fertility (Bongaarts  
83 1978; Easterlin 1975; Feyisetan and Casterline 2000; Hirschman 1994; Morgan and Hagewen  
84 2006; Phillips et al. 1988; Rindfuss et al. 1996). While Hirschman (1994) acknowledges that  
85 fertility limitation occurred prior to modern modes of contraception, attributable in part to the use  
86 of traditional contraceptive methods, evidence exists that recent family planning programs  
87 (Phillips et al. 1988) and access to modern contraception (Bongaarts 1978; Moursund and Kravdal  
88 2003; Townsend et al. 2011) help facilitate fertility decline. Furthermore, while the diffusion of  
89 information concerning new fertility norms and contraception options may increase demand for  
90 contraception, Feyisetan and Casterline (2000) find evidence that the available supply of  
91 contraception does not always meet demand. Indeed, the unmet need for contraception is  
92 continually reported by women globally, but especially by those living in many low- and middle-

93 income countries (Anik et al. 2022; Bongaarts and Bruce 1995; Feyisetan and Casterline 2000;  
94 Sitruk-Ware 2006; Townsend et al. 2011). A recent study using Demographic and Health survey  
95 data from 32 resource-limited countries estimated that approximately 24 percent of women  
96 experience an unmet need for contraception (Anik et al. 2022) and evidence suggests that unmet  
97 need is greatest for those living in absolute poverty (Anik et al. 2022; Gakidou and Vayena 2007).  
98 This gap in unmet need is concerning, as it exists despite progress in increasing access to a variety  
99 of health products for individuals and families living in low- and middle-income countries (Sitruk-  
100 Ware et al. 2013; Townsend et al. 2011). To help explain in part the continuing gap in unmet need  
101 for contraception, we assert that spatial inequalities between and within countries, especially  
102 resource-limited countries, lead to disparities in access to and use of contraception.

103

#### 104 **Spatial Inequality vs. Physical Mobility**

105 Throughout the different fertility frameworks is the notion that the transition to low fertility and  
106 the prevalent use of birth control is mediated by differential access to scarce resources. Whether  
107 these resources are structural (e.g., access to contraception, labor markets, and educational  
108 opportunities) or ideational (e.g., access to mass media and broader, culturally diverse social  
109 networks), the critical link is that access to scarce resources is often limited by one's relative spatial  
110 proximity to them (Agyei and Migadde 1995; Barber 2004; Barber and Axinn 2004; Jayachandran  
111 2021; Leinbach 2000; Pebley and Sastry 2004; Townsend et al. 2011; Zakharenko 2010).  
112 Accordingly, inequality in the spatial distribution of resources is likely to lead to inequalities in  
113 access to these resources.

114

115 In the resource-limited countries of Asia and Southeast Asia, a stark contrast in spatial inequality  
116 (Lobao et al. 2007) remains between rural and urban locations in terms of social and economic  
117 development (Korinek et al. 2006; Rigg 2002). In such settings, geographic location vis-a-vis a  
118 developed labor market or school affects an individual's access to employment and education  
119 opportunities (Baschieri and Falkingham 2009; Korinek et al. 2006; Leinbach 2000). Similarly,  
120 access to sources of mass media (Barber and Axinn 2004), and outside cultural influences are  
121 mitigated by proximity to locations with these resources (Barber 2004). Consequently, women  
122 located in relatively isolated, rural areas as compared to women located in more urban or suburban  
123 locations, will generally have less access to these resources. They are also more likely to lack the  
124 resources needed to bridge the disadvantages associated with physical isolation than their less  
125 isolated counterparts (Attan'e 2002; Korinek et al. 2006; 2005; Leinbach 1983; Pebley and Sastry  
126 2004; Rigg 2002).

127  
128 Conversely, increased physical mobility empowers individuals and groups to transcend spatial  
129 inequalities (Lobao et al. 2007) and increase access to scarce resources (Leinbach 2000; Rigg  
130 2002). In urban and rural locations of resource-limited nations, physical mobility has the potential  
131 to increase access to scarce resources such as education and occupational opportunities  
132 (Jayachandran 2021; Leinbach 2000; Rigg 2002) as well as facilitate the diffusion of new ideas  
133 and culture (Lawson and Borgerhoff Mulder 2016; Leinbach 2000; Rigg 2002); thereby acting as  
134 an agent of development (Cooley 1894; De Koninck 2000; Kunstadter 2000; Leinbach 2000; Owen  
135 1987; Rigg 2002). This critical role is augmented by access to owner-operated transportation or  
136 transportation services that are affordable and reliable. Individuals with access to roads and



137 vehicles to transport them are able to access options that otherwise would not be possible (Leinbach  
138 2000).

139  
140 In as much as improved physical mobility may empower isolated individuals to access options and  
141 opportunities that were previously unattainable, it is also possible that such improvements facilitate  
142 the creation of opportunity costs to fertility through increasing an individual's access to education  
143 and employment as well as improve access to contraception to control fertility. Accordingly, a  
144 necessary next step in explaining changes in fertility in resource-limited countries is to examine  
145 what types of interventions, technologies, and other mechanisms may help more geographically  
146 and socially isolated rural women overcome their disadvantaged position in accessing resources  
147 associated with declines in fertility that are generally located in more urban or suburban regions of  
148 resource-limited countries. One increasingly prevalent technology in the resource-limited  
149 countries of South and Southeast Asia that has yet to be examined for its potential to decrease the  
150 isolation of rural women is inexpensive motorcycles.

151  
152 **Motorcycles as Distance Demolishing Technologies**

153 Sometimes even the simplest of technological shifts can become the “engines” of social and  
154 economic change (Cooley 1894; Lenski 1984; Muir 2012; 2018; Sanders et al. 2018). Beginning  
155 in the mid-1990s, many Southeast Asian countries experienced dramatic increases in the number  
156 and availability of inexpensive motorcycles, thus transitioning their respective populations from  
157 pedestrian economies with a limited range of physical mobility to economies balanced on two  
158 motorized wheels and based on increased mobility. In Indonesia for example, between 1987 and  
159 2009, the number of motorcycles increased from 5.5 million to approximately 52.4 million over

160 this 22-year span with the most dramatic period of growth occurring from 1990 to 2009 at which  
161 time the number of registered motorcycles increased by approximately 893 percent (Badan Pusat  
162 Statistik 2011b; Badan Pusat Statistik 2011a). During the same approximate period, the total  
163 amount of asphalted roads in Indonesia increased by approximately 52,000 kilometers (Badan  
164 Pusat Statistik 2011b; Badan Pusat Statistik 2011a). These changes took place while the Indonesian  
165 population increased by only 15 percent. Similar trends occurred in Vietnam, where, since 1990  
166 motorcycles have increased by 1000 percent while the population increased by only 24 percent  
167 (Hsu et al. 2007: 15). In 2003, 95 percent of all registered vehicles in Vietnam were motorcycles  
168 (Hsu et al. 2007). Today, despite the increasing prevalence of automobile ownership, and with a  
169 few exceptions (e.g., Malaysia, Brunei, and Singapore), motorcycles represent the primary means  
170 of personal transportation for both rural and urban populations throughout Southeast Asia.

171

172 With access to one or more motorcycles in a household, members in that household become more  
173 geographically mobile, which potentially increases access to jobs, mass media, and educational  
174 opportunities. Furthermore, within the context of urban/rural dynamics, increased access to  
175 transportation is associated with changes in household organization such that “genders and  
176 generations renegotiate their respective roles” (Leinbach 2000: 5). Accordingly, increased physical  
177 mobility should create significant shifts in social mobility, especially for young women, by shifting  
178 their opportunity costs at the individual and household level from money “savers” to income  
179 “producers” (Leinbach 2000).

180

181 Traditionally young women from rural regions in resource-limited countries are engaged in  
182 “secondary” economic activities (e.g., planting and caring for a garden, watching livestock, etc.)

183 that save the household money versus making money (Cloud and Garrett 1996). Yet, given the  
184 opportunity, rural households or resource-limited households prefer to have their members make  
185 money (McMichael 2011; Morgan and Hagewen 2006) through engaging in “primary” economic  
186 activities versus money-saving activities. This is true not only for men, but also for women as rural  
187 families often propel female household members into employment opportunities as such  
188 opportunities are viewed as a family duty or necessary source of income (McMichael 2011: 92).  
189 Despite this preference, transportation costs and the lack of transportation infrastructure have been,  
190 for many rural households in the resourcelimited world, a prohibiting factor (Jayachandran 2021;  
191 Leinbach 1983; Olsson 2009; Replogle 1991; Rigg 2002). Consequently, young women tend to  
192 stay at home while their male siblings leave to pursue incomes (Cloud and Garrett 1996;  
193 Jayachandran 2021). When secondary economic activities prevail in rural households, higher  
194 fertility is at worst inconsequential for the households’ economic strategies and may in fact be  
195 beneficial by providing more domestic labor for localized money-saving activities (Knodel et al.  
196 1984; Morgan and Hagewen 2006). Furthermore, in resource-limited settings, children are often  
197 viewed as additional potential laborers capable of increasing the flow of economic resources to the  
198 household head (Caldwell 1982; Morgan and Hagewen 2006). Under such conditions higher  
199 fertility is likely.

200

201 Access to relatively inexpensive motorcycles should alter the conditions favoring higher fertility  
202 by influencing the economic strategies of individuals and households by decreasing transportation  
203 costs, increasing access to labor markets, and thereby increasing opportunity costs of fertility, a  
204 (Leinbach 2000). Under such a scenario, women and/or households may revise their economic  
205 strategies to view women as potential money-generators in the shortterm, and even in the long-

206 term if they can access additional educational opportunities as a gateway to long-term career  
207 opportunities. Early and frequent pregnancies in these conditions would constitute a major  
208 disruption to individual and household economic strategies as the potential to earn an income is  
209 more feasible. Moreover, increased physical mobility should empower women to reach broader  
210 economic markets and thereby increase their access to contraception. Thus, access to motorcycles  
211 should be associated with increased use of contraception as a means of addressing shifts in desired  
212 fertility. However, these mechanisms likely function in tandem with more general life course  
213 events.

214

### 215 **Fertility and the Life Course**

216 The life course perspective asserts that individuals face different challenges and desires depending  
217 upon where they are in their life's journey and that earlier decisions or life events affect subsequent  
218 decisions and life events. As such, an individual's age is a key indicator of a variety of life outcomes  
219 and fertility is a prime example (Rindfuss et al. 1996). Young women typically enter menarche  
220 somewhere between ages 11 to 15 and transition to menopause sometime around year 50, granted  
221 that there are variations across times and locations (Zacharias and Wurtman 1969; Stanford et al.  
222 1987). Within this time period, fecundity has a curvilinear relationship with age, first increasing in  
223 an individual's late teens and early twenties, typically peaking in their early 30s, and then gradually  
224 declining as they approach menopause (Homan et al. 2007). By necessity, fertility decisions and  
225 experiences occur within these limits. In addition, evidence suggests that women with high parity  
226 are more likely to limit future fertility through the use of contraception (Amin et al. 1987). We  
227 anticipate that interventions to help women increase their access to and use of contraception will  
228 be strongly influenced by these underlying patterns—Rindfuss et al. (1996) find that there are three

229 stages in the reproductive life course relevant to contraception use; i.e., early years, where  
230 contraception is used to delay first births and control the tempo of fertility; mid-career, where  
231 decisions are made whether or not to seep sterilization; and a final stage in which decisions revolve  
232 around when to stop using contraception if not previously sterilized. With this in mind, we posit  
233 that the impact of access to a motorcycle on contraception use is likely to change as a woman  
234 traverses her life course.

235

### 236 **Summary**

237 We have introduced fertility change, spatial inequality, and physical mobility as central themes in  
238 this article. Arguing in agreement with the established understanding that access to resources such  
239 as education, labor markets, and contraception is critical for transitions to low fertility, we have  
240 further argued that access to these resources is often limited in resourcelimited countries due to  
241 spatial inequalities. However, we have proposed that motorcycles, which constitute a primary  
242 “distance demolishing technology” (Scott 2009: 11) in South and Southeast Asia, may help isolated  
243 individuals living in these regions increase their access to these resources and thus facilitate  
244 transitions to low fertility across spatial divides through increasing the use of contraception. We  
245 examine these propositions by examining the extent to which access to a motorcycle juxtapose  
246 residence in a rural versus an urban location is associated with the use of contraception for female  
247 respondents in Cambodia, Indonesia, Nepal, the Philippines, and Timor-Leste.

248

249 With the extant literature in mind, we developed the following research questions to guide our  
250 investigation:

- 251 1. To what extent is access to a motorcycle associated with an increased probability of  
252 contraception use?
- 253 2. To what extent and in what direction is residence in a rural versus an urban location  
254 associated with the probability of contraception use?
- 255 3. Does an interaction effect exist between motorcycle access and rural versus urban residence,  
256 such that the impact of access to a motorcycle is more pronounced in rural versus urban  
257 locations?

258

## 259 **METHODS AND MATERIALS**

260 To answer these questions, we use data from the Demographic and Health Surveys (DHS):  
261 Cambodia (CDHS 2005, 2010, 2014, and 2021), Indonesia (IDHS 2007, 2012, and 2017), Nepal  
262 (NDHS 2006, 2011, and 2016), the Philippines (PDHS 2008, 2013, and 2017), and Timor-Leste  
263 (TLDHS 2009 and 2016). Data from Bangladesh and Myanmar were also included in preliminary  
264 analyses, but did not include all of the desired variables for the complete models (results that  
265 included these data were comparable across similar models). DHS data are nationally  
266 representative samples of female respondents from each respective country. Data were obtained  
267 through face-to-face survey interviews conducted with women between the ages of 15 and 49 using  
268 a formal survey instrument by trained interviewers. The DHS typically uses two-stage stratified  
269 cluster sampling to collect nationally representative samples, which have been divided into  
270 sampling domains. In the first stage, clusters, or enumeration areas (EAs), that represent the entire  
271 country are randomly selected from the sampling frame using estimates of probability proportional  
272 to cluster size (PPS). The second stage then involves the systematic sampling of households listed  
273 in each cluster or EA. Given the focus of this study on current contraception use, we selected

274 women from the original sample who were not currently pregnant at the time of their interview  
275 and who were not sterilized.

276

## 277 **Measures**

278 Analyses included in this research evaluate the relationships between key variables of interest and  
279 control variables with the outcome variables contraception use, modern contraception use,  
280 traditional contraception use, and unmet need. Contraception use was coded into a dichotomous  
281 variable with 0 = no current use of contraception or current use of folklore contraception (e.g.,  
282 spiritual or mystical methods) and 1 = current use of traditional contraception (e.g., withdrawal)  
283 or current use of modern contraception (e.g., a condom, pill, or injection.). Two additional variables  
284 were created to isolate and distinguish between modern and traditional contraception use, with  
285 either category set to 1 and 0 = no current use of contraception or current use of folklore  
286 contraception (an alternative coding that only included no current use of contraception as the  
287 reference category was also analyzed; the results were not substantively different from the results  
288 based on the combined reference group). A final outcome variable was created to represent an  
289 unmet need for contraception, which was coded as 0 = using contraception for birth spacing or  
290 limiting and 1 = unmet need for birth spacing or limiting.

291 A key indicator of interest in this study is area of residence, as it often mediates access to scarce  
292 resources. In order to analyze the impact of spatial inequality, analyses included the variable  
293 residence, which was a dichotomous variable coded as 0 = rural, 1 = urban. Juxtapose the potential  
294 impact of place on contraception use, access to a motorcycle was measured based on household  
295 ownership of a motorcycle, which was measured as a dichotomous variable coded as 0 = No, 1 =  
296 Yes. Additional right-hand-sided variables, representing established indicators of fertility, were

297 included as control variables in our models. Demographic variables included age, living children,  
298 and country of residence. Age was coded as an ordinal variable with standard 5-year age categories  
299 from 15 to 49 years. Living children was the respondent's total number of living children, coded  
300 as an ordinal variable with 0, 1, 2, and 3 plus children. Country was included as a categorical factor  
301 variable indicating a respondent's country of residence (1 = Indonesia (reference), 2 = Cambodia,  
302 3 = Nepal, 4 = Philippines, and 5 = Timor-Leste). Socioeconomic status was measured by  
303 respondent's occupation, coded as a categorical factor variable (1 = none (reference), 2 =  
304 professional, 3 = agricultural, 4 = subsistence, and 5 = manual labor), and by the household's  
305 relative wealth status as indicated by the DHS wealth index (coded as 1 = poorest (reference), 2 =  
306 poorer, 3 = middle, 4 = richer, 5 = richest). Educational/ideational control variables include  
307 education and TV use. Education was coded as an ordinal variable where 1 = no education  
308 (reference), 2 = incomplete primary, 3 = complete primary, 4 = incomplete secondary, 5 = complete  
309 secondary, and 6 = higher. TV use represented the frequency that a respondent reported watching  
310 TV (coded as 0 = none, 1 = less than once a week, 2 = at least once a week). Access variables  
311 included health clinic visit and family planning visit, each coded as dichotomous variables (0 =  
312 no, 1 = yes) for whether a respondent had visited a clinic or received a visit from a family planning  
313 professional within the past year. Also included were variables representing whether or not money  
314 or distance represented substantial barriers to accessing health care, each was coded as a  
315 dichotomous variable with 0 = No, 1 = Yes.

316

### 317 **Analytic Strategy**

318 Statistical analyses were performed using STATA version 15.1. We formally incorporated the  
319 DHS's complex sample design using the "survey" package and by including the "svy" command



320 in our logistic regression analyses. We used a combination of unadjusted and adjusted logistic  
321 regression models to explore the relationship between our outcome variables and key independent  
322 variables. Preliminary models included a baseline model, that evaluated unadjusted relationships  
323 between our outcome and key independent variables, as well as pathway-specific models that  
324 adjusted for related control variables (results for pathway specific models are available upon  
325 request). A fully adjusted model was estimated to assess associations between motorcycle  
326 ownership and residence with outcome variables, net the effects of all control variables. A final  
327 model was estimated that included interaction terms between motorcycle ownership, residence,  
328 and the number of living children. Results from the interaction model are presented as predicted  
329 probabilities (see Figure 1).

330

## 331 **RESULTS**

332 Roughly 60 percent of women reported living in rural areas and 47 percent reported household  
333 ownership of a motorcycle (see Tables 1-2). Women's age was distributed relatively evenly with  
334 most age categories representing between 14 to 17 percent of respondents. Approximately 70  
335 percent of women had at least one living child. About 13 percent of women had no education,  
336 another 60 percent had less than a secondary education, and 28 percent had a secondary education  
337 or higher. About half of the women reported working in a professional occupation or in agriculture,  
338 and a little less than 40 percent reported not having an occupation. Less than 15 percent of women  
339 reported having a recent visit from a family planning professional, but almost 43 percent had  
340 visited a health clinic in the past year. Money was reported as a substantial barrier to accessing  
341 health care by 40 percent of women and distance was reported by 29 percent.

342

343

344 Table 1: Descriptive Statistics by Outcome Indicator

|                             | Contraception Use |                  |                   | Modern Contraception |                  |                   | Traditional Contraception |                  |                   | Unmet Need       |                  |                   |
|-----------------------------|-------------------|------------------|-------------------|----------------------|------------------|-------------------|---------------------------|------------------|-------------------|------------------|------------------|-------------------|
|                             | No                | Yes              | Total             | No                   | Yes              | Total             | No                        | Yes              | Total             | No               | Yes              | Total             |
| <i>Motorcycle Ownership</i> |                   |                  |                   |                      |                  |                   |                           |                  |                   |                  |                  |                   |
| No                          | 54.79<br>(114446) | 49.85<br>(69598) | 52.81<br>(184044) | 54.79<br>(114446)    | 49.72<br>(57556) | 52.98<br>(172002) | 54.79<br>(114446)         | 50.48<br>(12042) | 54.35<br>(126488) | 49.96<br>(70103) | 64.81<br>(24169) | 53.08<br>(94272)  |
| Yes                         | 45.21<br>(94417)  | 50.15<br>(70017) | 47.19<br>(164434) | 45.21<br>(94417)     | 50.28<br>(58206) | 47.02<br>(152623) | 45.21<br>(94417)          | 49.52<br>(11811) | 45.65<br>(106228) | 50.04<br>(70204) | 35.19<br>(13124) | 46.92<br>(83328)  |
| <i>Residence</i>            |                   |                  |                   |                      |                  |                   |                           |                  |                   |                  |                  |                   |
| Rural                       | 59.97<br>(129534) | 59.99<br>(86168) | 59.98<br>(215702) | 59.97<br>(129534)    | 61.24<br>(72991) | 60.42<br>(202525) | 59.97<br>(129534)         | 53.87<br>(13177) | 59.35<br>(142711) | 60.02<br>(86641) | 66.35<br>(25811) | 61.36<br>(112452) |
| Urban                       | 40.03<br>(86469)  | 40.01<br>(57479) | 40.02<br>(143948) | 40.03<br>(86469)     | 38.76<br>(46193) | 39.58<br>(132662) | 40.03<br>(86469)          | 46.13<br>(11286) | 40.65<br>(97755)  | 39.98<br>(57710) | 33.65<br>(13093) | 38.64<br>(70803)  |
| <i>Age</i>                  |                   |                  |                   |                      |                  |                   |                           |                  |                   |                  |                  |                   |
| 15-19                       | 25.47<br>(55015)  | 4.19<br>(6019)   | 16.97<br>(61034)  | 25.47<br>(55015)     | 4.44<br>(5289)   | 18.00<br>(60304)  | 25.47<br>(55015)          | 2.98<br>(730)    | 23.19<br>(55745)  | 4.17<br>(6024)   | 6.52<br>(2534)   | 4.67<br>(8558)    |
| 20-24                       | 17.15<br>(37047)  | 14.14<br>(20303) | 15.95<br>(57350)  | 17.15<br>(37047)     | 14.98<br>(17853) | 16.38<br>(54900)  | 17.15<br>(37047)          | 10.02<br>(2450)  | 16.43<br>(39497)  | 14.10<br>(20343) | 16.38<br>(6370)  | 14.58<br>(26713)  |
| 25-29                       | 12.67<br>(27369)  | 20.17<br>(28968) | 15.67<br>(56337)  | 12.67<br>(27369)     | 21.09<br>(25128) | 15.67<br>(52497)  | 12.67<br>(27369)          | 15.70<br>(3840)  | 12.98<br>(31209)  | 20.13<br>(29056) | 19.09<br>(7422)  | 19.91<br>(36478)  |
| 30-34                       | 10.42<br>(22511)  | 21.11<br>(30309) | 14.69<br>(52820)  | 10.42<br>(22511)     | 21.51<br>(25632) | 14.37<br>(48143)  | 10.42<br>(22511)          | 19.12<br>(4677)  | 11.31<br>(27188)  | 21.09<br>(30440) | 17.25<br>(6706)  | 20.28<br>(37146)  |
| 35-39                       | 9.94<br>(21473)   | 19.08<br>(27406) | 13.59<br>(48879)  | 9.94<br>(21473)      | 18.87<br>(22485) | 13.12<br>(43958)  | 9.94<br>(21473)           | 20.12<br>(4921)  | 10.98<br>(26394)  | 19.09<br>(27555) | 16.09<br>(6257)  | 18.46<br>(33812)  |
| 40-44                       | 11.05<br>(23857)  | 14.05<br>(20171) | 12.24<br>(44028)  | 11.05<br>(23857)     | 12.99<br>(15483) | 11.74<br>(39340)  | 11.05<br>(23857)          | 19.17<br>(4688)  | 11.94<br>(28545)  | 14.10<br>(20344) | 14.66<br>(5702)  | 14.22<br>(26046)  |
| 45-49                       | 13.28<br>(28689)  | 7.26<br>(10432)  | 10.88<br>(39121)  | 13.28<br>(28689)     | 6.11<br>(7278)   | 10.73<br>(35967)  | 13.28<br>(28689)          | 12.89<br>(3154)  | 13.24<br>(31843)  | 7.31<br>(10549)  | 10.01<br>(3894)  | 7.88<br>(14443)   |
| <i>Living Children</i>      |                   |                  |                   |                      |                  |                   |                           |                  |                   |                  |                  |                   |
| 0                           | 46.15<br>(99682)  | 2.38<br>(3413)   | 28.67<br>(103095) | 46.15<br>(99682)     | 2.08<br>(2481)   | 30.48<br>(102163) | 46.15<br>(99682)          | 3.81<br>(932)    | 41.84<br>(100614) | 2.37<br>(3421)   | 5.76<br>(2240)   | 3.09<br>(5661)    |
| 1                           | 15.07<br>(32554)  | 22.42<br>(32212) | 18.01<br>(64766)  | 15.07<br>(32554)     | 23.06<br>(27479) | 17.91<br>(60033)  | 15.07<br>(32554)          | 19.35<br>(4733)  | 15.51<br>(37287)  | 22.37<br>(32290) | 21.54<br>(8380)  | 22.19<br>(40670)  |
| 2                           | 13.54<br>(29245)  | 34.81<br>(50002) | 22.03<br>(79247)  | 13.54<br>(29245)     | 35.61<br>(42447) | 21.39<br>(71692)  | 13.54<br>(29245)          | 30.88<br>(7555)  | 15.30<br>(36800)  | 34.74<br>(50150) | 24.79<br>(9646)  | 32.63<br>(59796)  |
| 3+                          | 25.24<br>(54522)  | 40.39<br>(58020) | 31.29<br>(112542) | 25.24<br>(54522)     | 39.25<br>(46777) | 30.22<br>(101299) | 25.24<br>(54522)          | 45.96<br>(11243) | 27.35<br>(65765)  | 40.52<br>(58490) | 47.91<br>(18638) | 42.09<br>(77128)  |
| <i>Education</i>            |                   |                  |                   |                      |                  |                   |                           |                  |                   |                  |                  |                   |
| No Education                | 14.51<br>(31333)  | 11.39<br>(16359) | 13.26<br>(47692)  | 14.51<br>(31333)     | 11.32<br>(13495) | 13.37<br>(44828)  | 14.51<br>(31333)          | 11.71<br>(2864)  | 14.22<br>(34197)  | 11.49<br>(16581) | 19.75<br>(7681)  | 13.24<br>(24262)  |
| Incomplete Primary          | 16.86<br>(36425)  | 18.58<br>(26686) | 17.55<br>(63111)  | 16.86<br>(36425)     | 18.31<br>(21821) | 17.38<br>(58246)  | 16.86<br>(36425)          | 19.89<br>(4865)  | 17.17<br>(41290)  | 18.61<br>(26863) | 20.44<br>(7950)  | 19.00<br>(34813)  |
| Complete Primary            | 10.54<br>(22760)  | 16.12<br>(23159) | 12.77<br>(45919)  | 10.54<br>(22760)     | 17.21<br>(20504) | 12.91<br>(43264)  | 10.54<br>(22760)          | 10.85<br>(2655)  | 10.57<br>(25415)  | 16.11<br>(23255) | 12.25<br>(4765)  | 15.29<br>(28020)  |
| Incomplete Secondary        | 29.01<br>(62655)  | 26.21<br>(37642) | 27.89<br>(100297) | 29.01<br>(62655)     | 26.83<br>(31973) | 28.23<br>(94628)  | 29.01<br>(62655)          | 23.18<br>(5669)  | 28.41<br>(68324)  | 26.13<br>(37721) | 23.37<br>(9092)  | 25.55<br>(46813)  |
| Complete Secondary          | 14.66<br>(31665)  | 16.32<br>(23440) | 15.32<br>(55105)  | 14.66<br>(31665)     | 16.08<br>(19161) | 15.16<br>(50826)  | 14.66<br>(31665)          | 17.49<br>(4279)  | 14.95<br>(35944)  | 16.30<br>(23523) | 13.85<br>(5388)  | 15.78<br>(28911)  |
| Higher                      | 14.42<br>(31153)  | 11.38<br>(16347) | 13.21<br>(47500)  | 14.42<br>(31153)     | 10.25<br>(12219) | 12.94<br>(43372)  | 14.42<br>(31153)          | 16.88<br>(4128)  | 14.67<br>(35281)  | 11.36<br>(16394) | 10.34<br>(4023)  | 11.14<br>(20417)  |
| <i>Occupation</i>           |                   |                  |                   |                      |                  |                   |                           |                  |                   |                  |                  |                   |
| None                        | 39.34<br>(80293)  | 36.06<br>(46559) | 38.07<br>(126852) | 39.34<br>(80293)     | 37.19<br>(39816) | 38.60<br>(120109) | 39.34<br>(80293)          | 30.57<br>(6743)  | 38.49<br>(87036)  | 36.03<br>(46734) | 37.36<br>(13307) | 36.32<br>(60041)  |
| Professional                | 25.87<br>(52805)  | 27.22<br>(35142) | 26.40<br>(87947)  | 25.87<br>(52805)     | 25.78<br>(27601) | 25.84<br>(80406)  | 25.87<br>(52805)          | 34.19<br>(7541)  | 26.69<br>(60346)  | 27.21<br>(35288) | 21.54<br>(7674)  | 25.99<br>(42962)  |
| Agricultural                | 24.07<br>(49118)  | 25.63<br>(33096) | 24.67<br>(82214)  | 24.07<br>(49118)     | 26.20<br>(28053) | 24.80<br>(77171)  | 24.07<br>(49118)          | 22.86<br>(5043)  | 23.95<br>(54161)  | 25.68<br>(33310) | 31.44<br>(11200) | 26.92<br>(44510)  |
| Subsistence                 | 2.39<br>(4875)    | 1.53<br>(1980)   | 2.06<br>(6855)    | 2.39<br>(4875)       | 1.32<br>(1415)   | 2.02<br>(6290)    | 2.39<br>(4875)            | 2.56<br>(565)    | 2.41<br>(5440)    | 1.53<br>(1989)   | 2.59<br>(923)    | 1.76<br>(2912)    |
| Manual Labor                | 8.33<br>(16991)   | 9.55<br>(12336)  | 8.80<br>(29327)   | 8.33<br>(16991)      | 9.50<br>(10170)  | 8.73<br>(27161)   | 8.33<br>(16991)           | 9.82<br>(2166)   | 8.47<br>(19157)   | 9.55<br>(12382)  | 7.07<br>(2519)   | 9.01<br>(14901)   |
| <i>Wealth Index</i>         |                   |                  |                   |                      |                  |                   |                           |                  |                   |                  |                  |                   |
| Poorest                     | 20.89<br>(45129)  | 20.71<br>(29749) | 20.82<br>(74878)  | 20.89<br>(45129)     | 21.72<br>(25882) | 21.19<br>(71011)  | 20.89<br>(45129)          | 15.81<br>(3867)  | 20.38<br>(48996)  | 20.81<br>(30046) | 24.75<br>(9628)  | 21.65<br>(39674)  |
| Poorer                      | 18.66<br>(40305)  | 19.98<br>(28705) | 19.19<br>(69010)  | 18.66<br>(40305)     | 20.60<br>(24551) | 19.35<br>(64856)  | 18.66<br>(40305)          | 16.98<br>(4154)  | 18.49<br>(44459)  | 19.98<br>(28844) | 19.78<br>(7697)  | 19.94<br>(36541)  |
| Middle                      | 18.79<br>(40586)  | 19.25<br>(27645) | 18.97<br>(68231)  | 18.79<br>(40586)     | 19.46<br>(40586) | 19.03<br>(63780)  | 18.79<br>(40586)          | 18.19<br>(4451)  | 18.73<br>(45037)  | 19.21<br>(27736) | 18.79<br>(7312)  | 19.13<br>(35048)  |
| Richer                      | 19.88<br>(42937)  | 19.58<br>(28130) | 19.76<br>(71067)  | 19.88<br>(42937)     | 19.30<br>(22999) | 19.67<br>(65936)  | 19.88<br>(42937)          | 20.97<br>(5131)  | 19.99<br>(48068)  | 19.56<br>(28234) | 18.82<br>(7322)  | 19.40<br>(35556)  |
| Richest                     | 21.78<br>(47046)  | 20.48<br>(29418) | 21.26<br>(76464)  | 21.78<br>(47046)     | 18.93<br>(22558) | 20.77<br>(69604)  | 21.78<br>(47046)          | 28.04<br>(6860)  | 22.42<br>(53906)  | 20.43<br>(29491) | 17.85<br>(6945)  | 19.88<br>(36436)  |

|                              | Contraception Use |                  |                   | Modern Contraception |                  |                   | Traditional Contraception |                  |                   | Unmet Need       |                  |                   |
|------------------------------|-------------------|------------------|-------------------|----------------------|------------------|-------------------|---------------------------|------------------|-------------------|------------------|------------------|-------------------|
|                              | No                | Yes              | Total             | No                   | Yes              | Total             | No                        | Yes              | Total             | No               | Yes              | Total             |
| <i>TV Use</i>                |                   |                  |                   |                      |                  |                   |                           |                  |                   |                  |                  |                   |
| None                         | 23.29<br>(50287)  | 20.25<br>(29065) | 22.08<br>(79352)  | 23.29<br>(50287)     | 20.10<br>(23936) | 22.16<br>(74223)  | 23.29<br>(50287)          | 20.97<br>(5129)  | 23.06<br>(55416)  | 20.33<br>(29326) | 29.67<br>(11534) | 22.31<br>(40860)  |
| Less than Once a Week        | 16.02<br>(34582)  | 13.47<br>(19337) | 15.00<br>(53919)  | 16.02<br>(34582)     | 13.35<br>(15904) | 15.07<br>(50486)  | 16.02<br>(34582)          | 14.04<br>(3433)  | 15.82<br>(38015)  | 13.47<br>(19430) | 16.46<br>(6398)  | 14.10<br>(25828)  |
| At Least Once a Week         | 60.69<br>(131015) | 66.28<br>(95152) | 62.92<br>(226167) | 60.69<br>(131015)    | 66.55<br>(79260) | 62.77<br>(210275) | 60.69<br>(131015)         | 64.99<br>(15892) | 61.13<br>(146907) | 66.20<br>(95500) | 53.88<br>(20945) | 63.58<br>(116445) |
| <i>Family Planning Visit</i> |                   |                  |                   |                      |                  |                   |                           |                  |                   |                  |                  |                   |
| No                           | 87.87<br>(160503) | 84.38<br>(89365) | 86.59<br>(249868) | 87.87<br>(160503)    | 84.68<br>(73747) | 86.84<br>(234250) | 87.87<br>(160503)         | 82.98<br>(15618) | 87.42<br>(176121) | 84.40<br>(89827) | 80.85<br>(25099) | 83.60<br>(114926) |
| Yes                          | 12.13<br>(22150)  | 15.62<br>(16546) | 13.41<br>(38696)  | 12.13<br>(22150)     | 15.32<br>(13342) | 13.16<br>(35492)  | 12.13<br>(22150)          | 17.02<br>(3204)  | 12.58<br>(25354)  | 15.60<br>(16598) | 19.15<br>(5945)  | 16.40<br>(22543)  |
| <i>Health Clinic Visit</i>   |                   |                  |                   |                      |                  |                   |                           |                  |                   |                  |                  |                   |
| No                           | 64.28<br>(122889) | 45.51<br>(49759) | 57.46<br>(172648) | 64.28<br>(122889)    | 44.88<br>(40579) | 58.05<br>(163468) | 64.28<br>(122889)         | 48.54<br>(9180)  | 62.87<br>(132069) | 45.61<br>(50096) | 47.55<br>(15378) | 46.05<br>(65474)  |
| Yes                          | 35.72<br>(68275)  | 54.49<br>(59569) | 42.54<br>(127844) | 35.72<br>(68275)     | 55.12<br>(49836) | 41.95<br>(118111) | 35.72<br>(68275)          | 51.46<br>(9733)  | 37.13<br>(78008)  | 54.39<br>(59750) | 52.45<br>(16961) | 53.95<br>(76711)  |
| <i>Money Barrier</i>         |                   |                  |                   |                      |                  |                   |                           |                  |                   |                  |                  |                   |
| Not a Big Problem            | 56.90<br>(110618) | 64.11<br>(76055) | 59.64<br>(186673) | 56.90<br>(110618)    | 65.56<br>(64282) | 59.81<br>(174900) | 56.90<br>(110618)         | 57.19<br>(11773) | 56.93<br>(122391) | 64.07<br>(76369) | 52.91<br>(17434) | 61.66<br>(93803)  |
| Big Problem                  | 43.10<br>(83773)  | 35.89<br>(42577) | 40.36<br>(126350) | 43.10<br>(83773)     | 34.44<br>(33765) | 40.19<br>(117538) | 43.10<br>(83773)          | 42.81<br>(8812)  | 43.07<br>(92585)  | 35.93<br>(42822) | 47.09<br>(15515) | 38.34<br>(58337)  |
| <i>Distance Barrier</i>      |                   |                  |                   |                      |                  |                   |                           |                  |                   |                  |                  |                   |
| Not a Big Problem            | 68.83<br>(133890) | 75.81<br>(89959) | 71.47<br>(223849) | 68.83<br>(133890)    | 75.98<br>(74515) | 71.23<br>(208405) | 68.83<br>(133890)         | 74.98<br>(15444) | 69.42<br>(149334) | 75.75<br>(90310) | 62.91<br>(20781) | 72.96<br>(111091) |
| Big Problem                  | 31.17<br>(60632)  | 24.19<br>(28709) | 28.53<br>(89341)  | 31.17<br>(60632)     | 24.02<br>(23556) | 28.77<br>(84188)  | 31.17<br>(60632)          | 25.02<br>(5153)  | 30.58<br>(65785)  | 24.25<br>(28917) | 37.09<br>(12252) | 27.04<br>(41169)  |
| <i>Country</i>               |                   |                  |                   |                      |                  |                   |                           |                  |                   |                  |                  |                   |
| Indonesia                    | 34.76<br>(63506)  | 52.33<br>(55430) | 41.21<br>(118936) | 34.76<br>(63506)     | 58.07<br>(50580) | 42.28<br>(114086) | 34.76<br>(63506)          | 25.77<br>(4850)  | 33.92<br>(68356)  | 52.43<br>(55809) | 26.24<br>(8148)  | 46.52<br>(63957)  |
| Cambodia                     | 24.15<br>(44124)  | 22.10<br>(23411) | 23.40<br>(67535)  | 24.15<br>(44124)     | 18.99<br>(16538) | 22.48<br>(60662)  | 24.15<br>(44124)          | 36.51<br>(6873)  | 25.30<br>(50997)  | 22.02<br>(23435) | 22.46<br>(6975)  | 22.12<br>(30410)  |
| Nepal                        | 11.26<br>(20575)  | 7.53<br>(7976)   | 9.89<br>(28551)   | 11.26<br>(20575)     | 6.95<br>(6054)   | 9.87<br>(26629)   | 11.26<br>(20575)          | 10.21<br>(1922)  | 11.16<br>(22497)  | 7.50<br>(7987)   | 20.50<br>(6365)  | 10.44<br>(14352)  |
| Philippines                  | 18.63<br>(34038)  | 14.66<br>(15534) | 17.17<br>(49572)  | 18.63<br>(34038)     | 12.08<br>(10520) | 16.51<br>(44558)  | 18.63<br>(34038)          | 26.64<br>(5014)  | 19.38<br>(39052)  | 14.66<br>(15608) | 18.27<br>(5673)  | 15.48<br>(21281)  |
| Timor-Leste                  | 11.20<br>(20471)  | 3.37<br>(3575)   | 8.33<br>(24046)   | 11.20<br>(20471)     | 3.92<br>(3411)   | 8.85<br>(23882)   | 11.20<br>(20471)          | 0.87<br>(164)    | 10.24<br>(20635)  | 3.38<br>(3601)   | 12.54<br>(3895)  | 5.45<br>(7496)    |

345

346

347

348

349

350

351

352

353

354

355

Almost 40 percent of women reported current use of traditional or modern contraception while another 21 percent indicated an unmet need for contraception. Associations with contraception use are reported as adjusted odds ratios (AOR). After adjusting for other factors commonly associated with contraception use, women with a motorcycle were more likely to report current contraception use (AOR = 1.55, 95% CI [1.50, 1.61]), modern contraception use (AOR = 1.60, 95% CI [1.54, 1.66]), and traditional contraception use (AOR = 1.49, 95% CI [1.41, 1.58]) compared to women who did not own a motorcycle (see Table 2). Women with a motorcycle were less likely to report an unmet need for contraception (AOR = 0.65, 95% CI [0.62, 0.68]) after adjusting for other variables. Women living in an urban area were more likely to report current contraception use (AOR = 1.05, 95% CI [1.01, 1.09]) and traditional contraception use (AOR = 1.34, 95% CI [1.26,

356 1.43]) compared to women living in a rural area. Urban vs. rural residence was negatively  
357 associated with unmet need for contraception (AOR = 0.90, 95% CI [0.85, 0.95]).  
358  
359 Women's age presented a curvilinear association with contraception use, first increasing in strength  
360 with a positive association with contraception use, modern contraception use, and traditional  
361 contraception use that peaked in strength between ages 20 - 24 and declined thereafter. A similar,  
362 but inverse association, was observed between age and unmet need for contraception. Education was  
363 positively associated with contraception use; for example, women who had completed secondary  
364 education were more likely to report contraception use compared to women with no education  
365 (AOR = 1.60, 95% CI [1.50, 1.71]). Education was inversely associated with an unmet need for  
366 contraception; for example, women who had completed primary education were less likely to  
367 report an unmet need for contraception compared to women with no education (AOR = 0.82, 95%  
368 CI [0.76, 0.88]). Women who had visited a health clinic in the past year were more likely to report  
369 contraception use compared to women who had not (AOR = 1.33, 95% CI [1.29, 1.37]); those who  
370 reported a visit from a family planning professional in the past year were also more likely to report  
371 contraception use compared to women who had not (AOR = 1.18, 95% CI [1.13, 1.23]). Having  
372 reported money or distance as barriers to accessing health care were both negatively associated  
373 with contraception use and positively associated with unmet need for contraception. Compared to  
374 women living in Indonesia, women from other countries were less likely to report contraception  
375 use and more likely to report an unmet need for contraception. For example, women from Timor-  
376 Leste were less likely to report modern contraception use compared to women from Indonesia  
377 (AOR = 0.20, 95% CI [0.18, 0.21.]). Finally, having a larger number of living children was strongly  
378 associated with contraception use and inversely related to unmet need for contraception.

Table 2: Adjusted Odds Ratios Evaluating Factors Associated with Contraception Use

|                              | Contraception Use |                 | Modern Contraception |                 | Traditional Contraception |               | Unmet Need |             |
|------------------------------|-------------------|-----------------|----------------------|-----------------|---------------------------|---------------|------------|-------------|
|                              | AOR               | 95% CI          | AOR                  | 95% CI          | AOR                       | 95% CI        | AOR        | 95% CI      |
| <b>Motorcycle Ownership</b>  |                   |                 |                      |                 |                           |               |            |             |
| No                           | 1.00              | [1.00,1.00]     | 1.00                 | [1.00,1.00]     | 1.00                      | [1.00,1.00]   | 1.00       | [1.00,1.00] |
| Yes                          | 1.55***           | [1.50,1.61]     | 1.60***              | [1.54,1.66]     | 1.49***                   | [1.41,1.58]   | 0.65***    | [0.62,0.68] |
| <b>Residence</b>             |                   |                 |                      |                 |                           |               |            |             |
| Rural                        | 1.00              | [1.00,1.00]     | 1.00                 | [1.00,1.00]     | 1.00                      | [1.00,1.00]   | 1.00       | [1.00,1.00] |
| Urban                        | 1.05*             | [1.01,1.09]     | 0.99                 | [0.95,1.04]     | 1.34***                   | [1.26,1.43]   | 0.90***    | [0.85,0.95] |
| <b>Age</b>                   |                   |                 |                      |                 |                           |               |            |             |
| 15-19                        | 1.00              | [1.00,1.00]     | 1.00                 | [1.00,1.00]     | 1.00                      | [1.00,1.00]   | 1.00       | [1.00,1.00] |
| 20-24                        | 1.50***           | [1.37,1.63]     | 1.28***              | [1.17,1.40]     | 1.89***                   | [1.58,2.26]   | 0.85**     | [0.76,0.94] |
| 25-29                        | 1.28***           | [1.17,1.39]     | 1.06                 | [0.96,1.16]     | 1.98***                   | [1.65,2.38]   | 0.75***    | [0.67,0.83] |
| 30-34                        | 1.09*             | [1.00,1.19]     | 0.87**               | [0.79,0.96]     | 2.08***                   | [1.73,2.50]   | 0.64***    | [0.57,0.72] |
| 35-39                        | 0.91*             | [0.83,0.99]     | 0.71***              | [0.64,0.78]     | 1.91***                   | [1.59,2.30]   | 0.66***    | [0.59,0.75] |
| 40-44                        | 0.59***           | [0.54,0.65]     | 0.43***              | [0.39,0.48]     | 1.56***                   | [1.30,1.87]   | 0.81**     | [0.72,0.92] |
| 45-49                        | 0.24***           | [0.22,0.27]     | 0.16***              | [0.15,0.18]     | 0.81*                     | [0.67,0.98]   | 1.16*      | [1.01,1.32] |
| <b>Living Children</b>       |                   |                 |                      |                 |                           |               |            |             |
| 0                            | 1.00              | [1.00,1.00]     | 1.00                 | [1.00,1.00]     | 1.00                      | [1.00,1.00]   | 1.00       | [1.00,1.00] |
| 1                            | 45.87***          | [41.73,50.42]   | 68.81***             | [61.54,76.92]   | 17.52***                  | [14.98,20.50] | 0.50***    | [0.44,0.57] |
| 2                            | 111.34***         | [100.57,123.26] | 176.63***            | [156.95,198.78] | 36.37***                  | [30.90,42.80] | 0.40***    | [0.35,0.45] |
| 3+                           | 117.44***         | [105.80,130.37] | 182.77***            | [161.81,206.45] | 43.12***                  | [36.59,50.81] | 0.53***    | [0.47,0.61] |
| <b>Education</b>             |                   |                 |                      |                 |                           |               |            |             |
| No Education                 | 1.00              | [1.00,1.00]     | 1.00                 | [1.00,1.00]     | 1.00                      | [1.00,1.00]   | 1.00       | [1.00,1.00] |
| Incomplete Primary           | 1.23***           | [1.17,1.30]     | 1.14***              | [1.08,1.21]     | 1.65***                   | [1.50,1.81]   | 0.96       | [0.89,1.02] |
| Complete Primary             | 1.68***           | [1.58,1.79]     | 1.53***              | [1.43,1.64]     | 2.10***                   | [1.88,2.34]   | 0.78***    | [0.72,0.85] |
| Incomplete Secondary         | 1.61***           | [1.52,1.71]     | 1.43***              | [1.34,1.52]     | 2.59***                   | [2.34,2.86]   | 0.82***    | [0.76,0.88] |
| Complete Secondary           | 1.60***           | [1.50,1.71]     | 1.36***              | [1.27,1.46]     | 3.51***                   | [3.13,3.92]   | 0.89**     | [0.82,0.97] |
| Higher                       | 1.53***           | [1.42,1.65]     | 1.24***              | [1.14,1.34]     | 3.59***                   | [3.19,4.05]   | 0.97       | [0.88,1.06] |
| <b>Occupation</b>            |                   |                 |                      |                 |                           |               |            |             |
| None                         | 1.00              | [1.00,1.00]     | 1.00                 | [1.00,1.00]     | 1.00                      | [1.00,1.00]   | 1.00       | [1.00,1.00] |
| Professional                 | 0.98              | [0.95,1.02]     | 0.95**               | [0.91,0.98]     | 1.16***                   | [1.08,1.23]   | 0.85***    | [0.81,0.90] |
| Agricultural                 | 1.09***           | [1.05,1.14]     | 1.11***              | [1.06,1.16]     | 1.03                      | [0.96,1.11]   | 0.88***    | [0.83,0.93] |
| Subsistence                  | 0.80***           | [0.72,0.88]     | 0.72***              | [0.65,0.80]     | 1.00                      | [0.87,1.15]   | 1.19**     | [1.06,1.34] |
| Manual Labor                 | 1.22***           | [1.15,1.28]     | 1.21***              | [1.14,1.28]     | 1.24***                   | [1.14,1.36]   | 0.65***    | [0.60,0.70] |
| <b>Household Wealth</b>      |                   |                 |                      |                 |                           |               |            |             |
| Poorest                      | 1.00              | [1.00,1.00]     | 1.00                 | [1.00,1.00]     | 1.00                      | [1.00,1.00]   | 1.00       | [1.00,1.00] |
| Poorer                       | 1.11***           | [1.07,1.16]     | 1.14***              | [1.08,1.19]     | 0.99                      | [0.92,1.07]   | 0.91**     | [0.86,0.97] |
| Middle                       | 1.02              | [0.97,1.07]     | 1.03                 | [0.97,1.08]     | 0.99                      | [0.92,1.08]   | 0.97       | [0.91,1.04] |
| Richer                       | 0.98              | [0.93,1.04]     | 0.98                 | [0.92,1.04]     | 0.97                      | [0.89,1.06]   | 0.99       | [0.93,1.06] |
| Richest                      | 0.94*             | [0.88,1.00]     | 0.90**               | [0.84,0.96]     | 1.00                      | [0.91,1.10]   | 1.05       | [0.97,1.14] |
| <b>TV Use</b>                |                   |                 |                      |                 |                           |               |            |             |
| None                         | 1.00              | [1.00,1.00]     | 1.00                 | [1.00,1.00]     | 1.00                      | [1.00,1.00]   | 1.00       | [1.00,1.00] |
| Less than Once a Week        | 1.15***           | [1.09,1.21]     | 1.14***              | [1.08,1.20]     | 1.16***                   | [1.07,1.26]   | 0.87***    | [0.81,0.93] |
| At Least Once a Week         | 1.29***           | [1.23,1.36]     | 1.30***              | [1.24,1.37]     | 1.21***                   | [1.12,1.31]   | 0.82***    | [0.78,0.87] |
| <b>Family Planning Visit</b> |                   |                 |                      |                 |                           |               |            |             |
| No                           | 1.00              | [1.00,1.00]     | 1.00                 | [1.00,1.00]     | 1.00                      | [1.00,1.00]   | 1.00       | [1.00,1.00] |
| Yes                          | 1.18***           | [1.13,1.23]     | 1.23***              | [1.18,1.29]     | 1.06                      | [0.99,1.13]   | 0.81***    | [0.77,0.85] |
| <b>Health Clinic Visit</b>   |                   |                 |                      |                 |                           |               |            |             |
| No                           | 1.00              | [1.00,1.00]     | 1.00                 | [1.00,1.00]     | 1.00                      | [1.00,1.00]   | 1.00       | [1.00,1.00] |
| Yes                          | 1.33***           | [1.29,1.37]     | 1.37***              | [1.33,1.42]     | 1.18***                   | [1.12,1.24]   | 0.84***    | [0.80,0.87] |
| <b>Money Barrier</b>         |                   |                 |                      |                 |                           |               |            |             |
| Not a Big Problem            | 1.00              | [1.00,1.00]     | 1.00                 | [1.00,1.00]     | 1.00                      | [1.00,1.00]   | 1.00       | [1.00,1.00] |
| Big Problem                  | 0.88***           | [0.85,0.91]     | 0.87***              | [0.84,0.90]     | 0.94*                     | [0.89,0.99]   | 1.08***    | [1.04,1.14] |
| <b>Distance Barrier</b>      |                   |                 |                      |                 |                           |               |            |             |
| Not a Big Problem            | 1.00              | [1.00,1.00]     | 1.00                 | [1.00,1.00]     | 1.00                      | [1.00,1.00]   | 1.00       | [1.00,1.00] |
| Big Problem                  | 0.90***           | [0.87,0.93]     | 0.91***              | [0.88,0.95]     | 0.87***                   | [0.82,0.93]   | 1.09***    | [1.04,1.14] |
| <b>Country</b>               |                   |                 |                      |                 |                           |               |            |             |
| Indonesia                    | 1.00              | [1.00,1.00]     | 1.00                 | [1.00,1.00]     | 1.00                      | [1.00,1.00]   | 1.00       | [1.00,1.00] |
| Cambodia                     | 0.75***           | [0.71,0.79]     | 0.51***              | [0.48,0.54]     | 3.88***                   | [3.58,4.20]   | 1.88***    | [1.75,2.03] |
| Nepal                        | 0.52***           | [0.48,0.56]     | 0.36***              | [0.32,0.39]     | 2.55***                   | [2.26,2.88]   | 4.30***    | [3.92,4.71] |
| Philippines                  | 0.65***           | [0.62,0.68]     | 0.45***              | [0.42,0.47]     | 2.51***                   | [2.32,2.72]   | 2.17***    | [2.02,2.33] |
| Timor-Leste                  | 0.21***           | [0.19,0.23]     | 0.20***              | [0.18,0.21]     | 0.19***                   | [0.15,0.25]   | 6.00***    | [5.41,6.64] |

Exponentiated coefficients; 95% confidence intervals in brackets  
 \* $p < 0.05$ , \*\* $p < 0.01$ , \*\*\* $p < 0.001$

385 Given the strength of the association between the number of living children and contraception use,  
386 a three-way interaction model was estimated to evaluate associations between motorcycle  
387 ownership in the context of rural vs. urban areas, but also evaluate how these interactive  
388 associations may vary depending upon the number of living children that a woman reported.  
389 Results from this interaction model (fully adjusted for other control variables) were used to  
390 generate predicted probabilities of contraception use, modern contraception use, traditional  
391 contraception use, and unmet need for contraception; these predicted probabilities are visualized  
392 in Figure 1. The probability of contraception use, particularly modern contraception use, was  
393 higher for women who had at least one living child and who also owned a motorcycle. This pattern  
394 of association was strongest for women living in rural areas. A moderate increase in probability of  
395 traditional contraception use was found for women in both rural and urban areas if they had 2 or  
396 more living children. Finally, motorcycle ownership was consistently associated with a lower  
397 probability of reporting an unmet need for contraception by women living in a rural area regardless  
398 of the number of living children that they reported. The same association is only seen for women  
399 with 2 or more children who lived in urban areas.

400

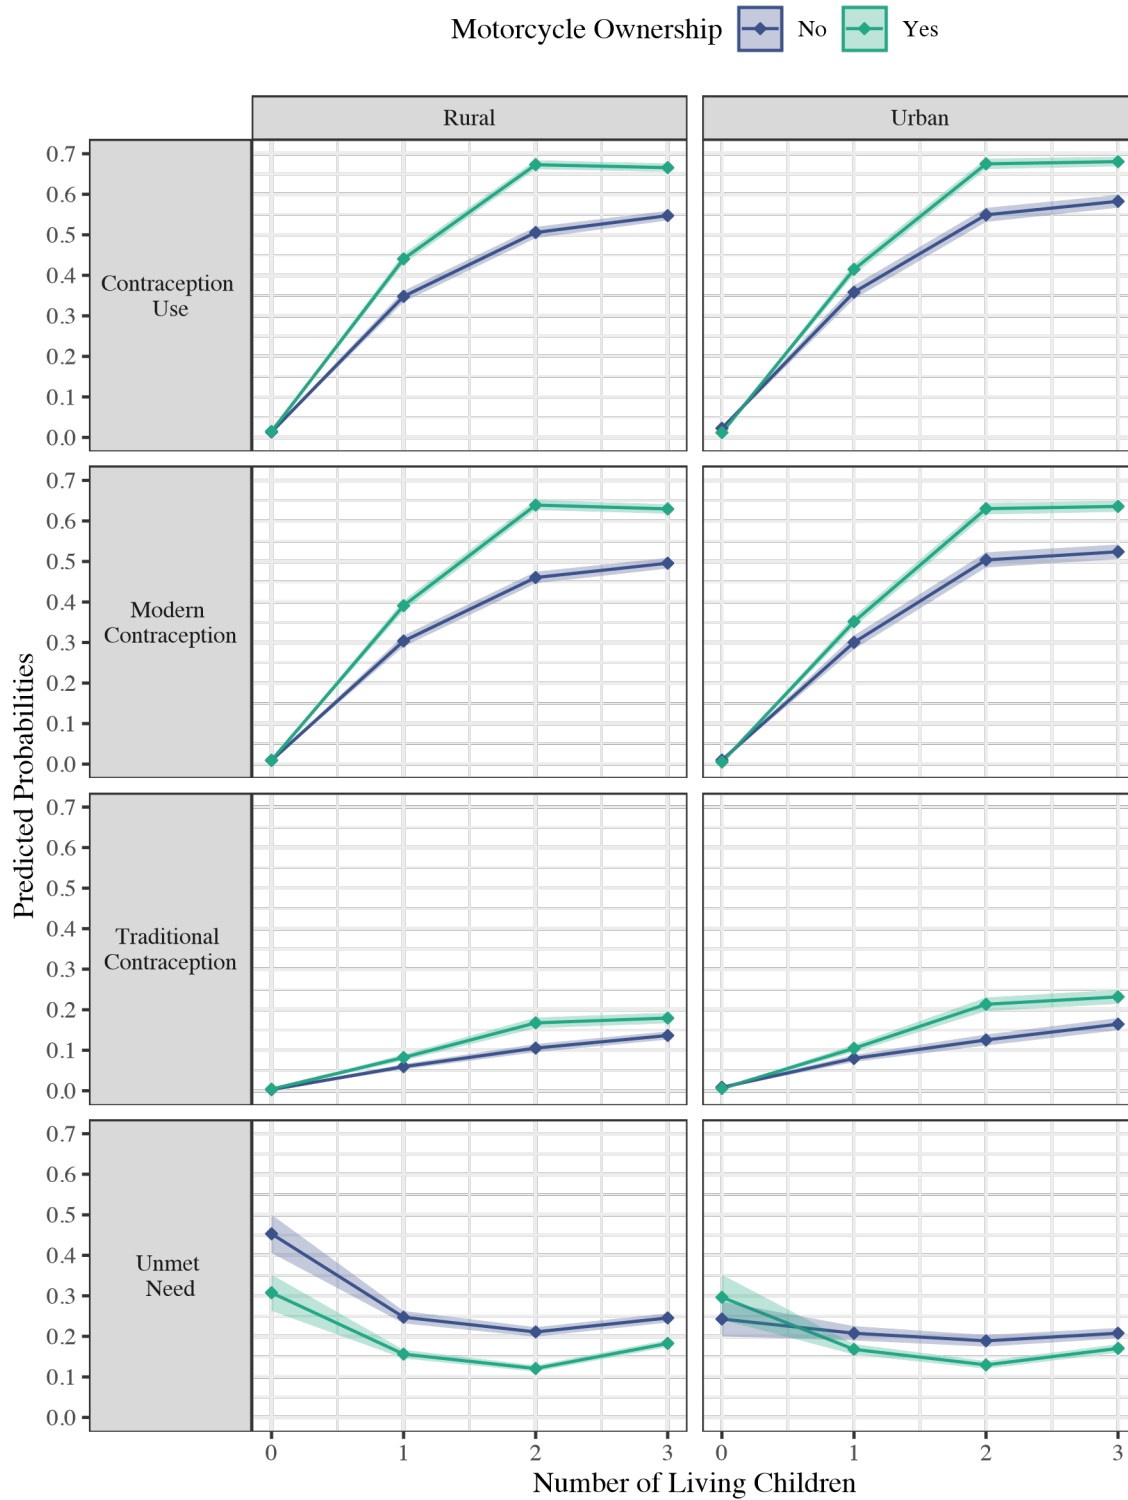

401

402 Figure 1. Predicted Probability of Contraception Use, Modern Contraception Use, Traditional  
 403 Contraception Use, and Unmet Need. Estimated by a three-way interaction between Motorcycle Ownership,  
 404 Residence, and Number of Living Children. Figures were created in R with the ggplot2 package.

## 405 **DISCUSSION**

406 Our results are consistent with the premise that motorcycles facilitate contraception use among  
407 women living in resource-limited countries in South and Southeast Asia and thereby contribute to  
408 decreases in fertility. This relationship is contextualized by whether a woman lives in an urban or  
409 rural setting and the number of children already present in their household; i.e., the observed  
410 associations between motorcycle ownership and various indicators of contraception use are  
411 strongest in rural locations and increase in magnitude with increases in the number of living  
412 children. These relationships are generally robust to adjusting for additional control variables;  
413 however, in urban areas, the degree to which motorcycles are associated with contraception use  
414 diminishes after accounting for other factors. It's noteworthy to highlight that contraception use  
415 appears to have a curvilinear relationship with women's age as its use declines as women age  
416 regardless of residence location, access to a motorcycle, or the number of children present in the  
417 household, supporting the premise that a life course perspective adds clarity to patterns of  
418 contraception use over time.

419 In proposing that motorcycle access is associated with an increased probability of contraception  
420 use and thereby negatively associated with fertility, we presented an argument that motorcycles  
421 create opportunity costs to fertility through increasing an individual's ability to access scarce  
422 resources such as education and labor market opportunities as well as facilitating the diffusion of  
423 new ideas and information-particularly in circumstances in which such opportunities are located  
424 beyond an individual's local community. Our results are consistent with these pathways  
425 functioning as potential mechanisms—including variables related to these pathways attenuated the  
426 strength of the association between motorcycles and contraception, but did not eliminate it.  
427 Importantly, our results are robust to controlling for household-level wealth. This suggests that  
428 motorcycle access functions beyond that of a proxy for household- or individual-level economic  
429 privilege. We further predicted that spatial inequalities associated with rural residence will  
430 negatively affect contraception use.



431 Results are consistent with this hypothesis—the relationship between rural residence and  
432 contraception use was negative and generally robust to adjusting for additional variables. However,  
433 the relationship between rural residence and contraception use does diminish after controlling for  
434 indicators of socioeconomic status, education, and/or employment, suggesting that differences in  
435 wealth, education, and employment account for part of this relationship. This is consistent with the  
436 hypothesis that a distinguishing characteristic of rural vs. urban residence is that of spatial  
437 inequality. It is of interest, however, that while the rural penalty diminishes, motorcycle ownership  
438 remained a powerful indicator of increased probability of contraception use even after adjusting  
439 for these control variables.

440 While the results support our premise concerning the relationship between contraception use  
441 and access to a motorcycle, there are limitations. The largest limitation is the power of our data.  
442 While DHS data is well adapted for cross-country comparison as it is collected in different  
443 countries using comparable instruments, this data is cross-sectional at the individual level and thus  
444 poses limitations for time-sensitive analyses of relationships between variables. This limits the  
445 power of our models in testing causal mechanisms; thus, while we argue with confidence that the  
446 models represent relationships of association, we are limited in our ability to argue for relationships  
447 of causality. In addition, not all of the indicators included were ideal for the concepts we wanted  
448 to control for, rather, they were the best approximation available. Future research should further  
449 explore these relationships using longitudinal data with more precise indicators to address these  
450 limitations, even if such data is available for only specific countries. Despite these limitations, we  
451 believe that these analyses were conducted with the best data available for cross-country analysis  
452 of trends in several of the resource-limited countries of Southeast Asia.

453 The innovative contribution of the research presented in this article is the synthesis of several  
454 premises in making the argument that motorcycles potentially facilitate fertility transitions in  
455 resource-limited countries through increasing access to knowledge, labor markets and  
456 contraception. Individually, these core premises are not novel. What is novel, is the synthesis of  
457 these ideas in arguing that a previously neglected technology, a motorcycle in South or Southeast

458 Asia, has the ability to help disadvantaged women living in rural regions cross spatial divides and  
459 thereby increase their probability of using contraception and gain increased control over their  
460 fertility. As such, it joins the list of other “Distance Demolishing Technologies” (Scott 2009) such  
461 as cell phones and the internet that help individuals and their communities to overcome social and  
462 economic isolation. We anticipate that these technologies help individuals overcome isolation  
463 beyond the rural/urban divide. Furthermore, in as much as these technologies empower individuals  
464 to overcome social and geographic isolation, they likely function as indicators of social mobility,  
465 individual autonomy, and may even influence individuals’ experience of community. Research  
466 examining these would endeavor to answer the call for research investigating “innovative and  
467 infrequently used measures” to understand women’s empowerment (Upadhyay et al. 2014).

468 **REFERENCES**

- 469 Agyei, W. K. and Migadde, M. (1995). Demographic and sociocultural factors influencing  
470 contraceptive use in uganda. *Journal of Biosocial Science*, 27(01):47–60.
- 471 Amin, R., Mariam, A., and Faruqee, R. (1987). Trends and differentials in knowledge, ever use,  
472 current use, and future intended use of contraceptives in rural bangladesh: Evidence from three  
473 surveys. *The Pakistan Development Review*, pages 201–214.
- 474 Anik, A. I., Islam, M. R., and Rahman, M. S. (2022). Association between socioeconomic factors  
475 and unmet need for modern contraception among the young married women: A comparative  
476 study across the low-and lower-middle-income countries of asia and subsaharan africa. *PLOS*  
477 *Global Public Health*, 2(7):e0000731.
- 478 Attan'e, I. (2002). A Half Century of Chinese Socialism: The Changing Fortunes of Peasant  
479 Families. *Journal of Family History*, 27(2):150–171.
- 480 Axinn, W. G. and Barber, J. S. (2001). Mass Education and Fertility Transition. *American*  
481 *Sociological Review*, 66(4):481–505.
- 482 Axinn, W. G. and Yabiku, S. T. (2001). Social Change, the Social Organization of Families, and  
483 Fertility Limitation. *American Journal of Sociology*, 106(5):1219–1261.
- 484 Barber, J. S. (2004). Community Social Context and Individualistic Attitudes Toward Marriage.  
485 *Social Psychology Quarterly*, 67(3):236–256.
- 486 Barber, J. S. and Axinn, W. G. (2004). New ideas and fertility limitation: The role of mass media.  
487 *Journal of Marriage and Family*, 66(5):1180–1200.
- 488 Barro, R. J. and Becker, G. S. (1989). Fertility Choice in a Model of Economic Growth.  
489 *Econometrica*, 57(2):481–501.

- 490 Baschieri, A. and Falkingham, J. (2009). Staying in school: assessing the role of access,  
491 availability, and economic opportunities - the case of Tajikistan. *Population, Space and Place*,  
492 15(3):205–224.
- 493 Becker, G. S. (1960). An economic analysis of fertility. In *Demographic and economic change in*  
494 *developed countries*, pages 209–240. Columbia University Press.
- 495 Becker, G. S. and Lewis, H. G. (1973). On the Interaction between the Quantity and Quality of  
496 Children. *Journal of Political Economy*, 81(2):S279–S288.
- 497 Bongaarts, J. (1978). A Framework for Analyzing the Proximate Determinants of Fertility.  
498 *Population and Development Review*, 4(1):105–132.
- 499 Bongaarts, J. and Bruce, J. (1995). The causes of unmet need for contraception and the social  
500 content of services. *Studies in Family Planning*, 26(2):57–75.
- 501 Bongaarts, J. and Casterline, J. B. (2018). From fertility preferences to reproductive outcomes in  
502 the developing world. *Population and development review*, pages 793–809.
- 503 Bongaarts, J. and Watkins, S. C. (1996). Social Interactions and Contemporary Fertility  
504 Transitions. *Population and Development Review*, 22(4):639–682.
- 505 Brewster, K. L. and Rindfuss, R. R. (2000). Fertility and Women’s Employment in Industrialized  
506 Nations. *Annual Review of Sociology*, 26(1):271–296.
- 507 Caldwell, J. C. (1982). *Theory of fertility decline*. Academic Press.
- 508 Cloud, K. and Garrett, N. (1996). A modest proposal for inclusion of women’s household human  
509 capital production in analysis of structural transformation. *Feminist Economics*, 2(3):93–119.
- 510 Coale, A. (1973). The demographic transition reconsidered. In *Proceedings of the International*  
511 *Population Conference*, volume 1.

- 512 Coale, A. J. and Watkins, S. C. (1986). *The decline of fertility in Europe*. Princeton University  
513 Press.
- 514 Cooley, C. H. (1894). The Theory of Transportation. *Publications of the American Economic*  
515 *Association*, 9(3):13–148.
- 516 Davis, K. (1963). The theory of change and response in modern demographic history. *Population*  
517 *index*, 29(4):345–366.
- 518 De Koninck, R. (2000). The theory and practice of frontier development: Vietnam’s contribution.  
519 *Asia Pacific Viewpoint*, 41(1):7–21.
- 520 Dharmalingam, A. and Morgan, S. P. (1996). Women’s Work, Autonomy, and Birth Control:  
521 Evidence From Two South India Villages. *Population Studies*, 50(2):187–201.
- 522 Docquier, F. (2004). Income Distribution, Non-convexities and the Fertility–Income Relationship.  
523 *Economica*, 71(282):261–273.
- 524 Easterlin, R. A. (1975). An Economic Framework for Fertility Analysis. *Studies in Family*  
525 *Planning*, 6(3):54–63.
- 526 Ekert-Jaffé, O. (1986). Effets et limites des aides financières aux familles: Une expérience et un  
527 modèle. *Population (French Edition)*, pages 327–348.
- 528 Ekert-Jaffe, O. and Stier, H. (2009). Normative or economic behavior? Fertility and women’s  
529 employment in Israel. *Social Science Research*, 38(3):644–655.
- 530 Feyisetan, B. and Casterline, J. B. (2000). Fertility preferences and contraceptive change in  
531 developing countries. *International Family Planning Perspectives*, pages 100–109.
- 532 Gakidou, E. and Vayena, E. (2007). Use of modern contraception by the poor is falling behind.  
533 *PLoS medicine*, 4(2):e31.

- 534 Gottdiener, M. and Hutchison, R. (2010). *The New Urban Sociology: Fourth Edition*. Westview  
535 Press, fourth edition edition.
- 536 Hakim, C. (2003). A new approach to explaining fertility patterns: Preference theory.  
537 *Population and development review*, 29(3):349–374.
- 538 Hirschman, C. (1994). Why Fertility Changes. *Annual Review of Sociology*, 20:203–233.
- 539 Homan, G. F., Davies, M., and Norman, R. (2007). The impact of lifestyle factors on reproductive  
540 performance in the general population and those undergoing infertility treatment: a review.  
541 *Human Reproduction Update*, 13(3):209–223.
- 542 Hsu, T.-P., Tsai, C.-C., and Lin, Y.-J. (2007). Comparative analysis of household car and  
543 motorcycle ownership characteristics. *Journal of the Eastern Asia Society for Transportation*  
544 *Studies*, 7:105–115.
- 545 Jayachandran, S. (2021). Social norms as a barrier to women’s employment in developing  
546 countries. *IMF Economic Review*, 69(3):576–595.
- 547 Knodel, J., Havanon, N., and Pramualratana, A. (1984). Fertility transition in Thailand: A  
548 qualitative analysis. *Population and Development Review*, pages 297–328.
- 549 Knodel, J. and Walle, E. v. d. (1979). Lessons from the Past: Policy Implications of Historical  
550 Fertility Studies. *Population and Development Review*, 5(2):217–245.
- 551 Korinek, K., Chen, F., Alva, S., and Entwisle, B. (2006). Household Economic Transformation and  
552 Recent Fertility in Emerging Market Economies: China and Vietnam Compared. *Journal of*  
553 *Comparative Family Studies*, 37:191–234.
- 554 Korinek, K., Entwisle, B., and Jampaklay, A. (2005). Through thick and thin: layers of social ties  
555 and urban settlement among Thai migrants. *American Sociological Review*,  
556 70(5):779–800.

- 557 Kravdal, Ø. (1994). The importance of economic activity, economic potential and economic  
558 resources for the timing of first births in Norway. *Population Studies*, 48(2):249–267.
- 559 Kunstadter, P. (2000). Changing patterns of economics among Hmong in Northern Thailand  
560 1960–1990. *Turbulent times and enduring peoples; Mountain minorities in the South-East Asian*  
561 *Massif*, pages 167–92.
- 562 Lawson, D. W. and Borgerhoff Mulder, M. (2016). The offspring quantity–quality trade-off and  
563 human fertility variation. *Philosophical Transactions of the Royal Society B: Biological*  
564 *Sciences*, 371(1692):20150145.
- 565 Leinbach, T. R. (1983). Rural Transport and Population Mobility in Indonesia. *The Journal of*  
566 *Developing Areas*, 17(3):349–364.
- 567 Leinbach, T. R. (2000). Mobility in development context: changing perspectives, new  
568 interpretations, and the real issues. *Journal of Transport Geography*, 8(1):1–9.
- 569 Lenski, G. E. (1984). *Power and Privilege: A Theory of Social Stratification*. The University of  
570 North Carolina Press.
- 571 Lobao, L. M., Hooks, G., and Tickamyer, A. R., editors (2007). *The Sociology of Spatial Inequality*.  
572 State University of New York Press, 1 edition.
- 573 McMichael, P. (2011). *Development and Social Change: A Global Perspective*. SAGE Pub-  
574 lications, Inc, fifth edition edition.
- 575 Morgan, S. P. and Hagewen, K. J. (2006). Fertility. In Poston, D. L. and Micklin, M., editors,  
576 *Handbook of Population*, pages 229–249. Kluwer Academic Publishers-Plenum Publishers,  
577 New York.
- 578 Moursund, A. and Kravdal, Ø. (2003). Individual and community effects of women’s education  
579 and autonomy on contraceptive use in India. *Population Studies*, 57(3):285–301.

580 Muir, J. A. (2012). *Indicators of fertility change in a developing nation: examining the impact of*  
581 *motorcycles as a distance demolishing technology on fertility change in rural Indonesia.*  
582 Brigham Young University.

583 Muir, J. A. (2018). Another mhealth? examining motorcycles as a distance demolishing  
584 determinant of health care access in south and southeast asia. *Journal of Transport & Health,*  
585 11:153–166.

586 Notestein, F. W. (1945). Population: the long view. *Schultz TW, ed. Food for the world.*

587 Notestein, F. W. (1953). *Economic problems of population change.* Oxford University Press.

588 Olsson, J. (2009). Improved road accessibility and indirect development effects: evidence from  
589 rural Philippines. *Journal of Transport Geography,* 17(6):476–483.

590 Owen, W. (1987). *Transportation and World Development: Mobility and the Global Economy.* The  
591 Johns Hopkins University Press, first edition edition.

592 Pebley, A. R. and Sastry, N. (2004). Neighborhoods, poverty, and children’s well-being. *Social*  
593 *inequality,* pages 119–145.

594 Phillips, J. F., Simmons, R., Koenig, M. A., and Chakraborty, J. (1988). Determinants of  
595 reproductive change in a traditional society: evidence from Matlab, Bangladesh. *Studies in*  
596 *Family Planning,* 19(6):313–334.

597 Replogle, M. A. (1991). *Sustainable transportation strategies for third-world development.*  
598 Number 1294.

599 Rigg, J. (2002). Roads, marketization and social exclusion in Southeast Asia: What do roads do to  
600 people? *Bijdragen tot de Taal-, Land-en Volkenkunde,* 158(4):619–636.

601 Rindfuss, R. R., Guilkey, D. K., Entwisle, B., Chamrathirong, A., and Sawangdee, Y.  
602 (1996). *The Family Building Life Course and Contraceptive Use: Nang Rong, Thailand.*



603 *Population Research and Policy Review*, 15(4):341–368.

604 Sanders, S. R., Muir, J. A., and Brown, R. B. (2018). Overcoming geographic penalties of  
605 inequality: The effects of distance-demolishing technologies on household well-being in  
606 vietnam. *Asian Journal of Social Science*, 46(3):260–280.

607 Scott, J. C. (2009). *The Art of Not Being Governed: An Anarchist History of Upland Southeast*  
608 *Asia*. Yale University Press.

609 Sitruk-Ware, R. (2006). Contraception: an international perspective. *Contraception*, 73(3):215–  
610 222.

611 Sitruk-Ware, R., Nath, A., and Mishell, D. R. (2013). Contraception technology: past, present and  
612 future. *Contraception*, 87(3):319–330.

613 Smith, N. (2008). *Uneven Development: Nature, Capital, and the Production of Space*. University  
614 of Georgia Press, 3rd edition.

615 Spain, D. and Bianchi, S. M. (1996). *Balancing act: Motherhood, marriage, and employment*  
616 *among American women*. Russell Sage Foundation Publications.

617 Stanford, J. L., Hartge, P., Brinton, L. A., Hoover, R. N., and Brookmeyer, R. (1987). Factors  
618 influencing the age at natural menopause. *Journal of chronic diseases*, 40(11):995–1002.

619 Townsend, J. W., Sitruk-Ware, R., Williams, K., Askew, I., and Brill, K. (2011). New strategies for  
620 providing hormonal contraception in developing countries. *Contraception*, 83(5):405–409.

621 Upadhyay, U. D., Gipson, J. D., Withers, M., Lewis, S., Ciaraldi, E. J., Fraser, A., Huchko, M. J.,  
622 and Prata, N. (2014). Women’s empowerment and fertility: a review of the literature. *Social*  
623 *science & medicine*, 115:111–120.

624 Zacharias, L. and Wurtman, R. J. (1969). Age at menarche. *N Engl J Med*, 280((16)):868–75.

- 625 Zakharenko, R. (2010). Children Versus Ideas: An 'Influential' Theory of Demographic Transition.
- 626 *Available at SSRN 1391753.*
